# Supplementary material
Source: MDPI journal article supplement (https://www.mdpi.com/2227-7102/13/9/937)
Supplement: s1 [file s1]

**Supplementary Table S1. Peer Evaluation Rubric**

|                                     | <b>0 point</b>                                                     | <b>1 point</b>                                                                                    | <b>2 points</b>                                                                                    | <b>3 points</b>                                                                               | <b>4 points</b>                                                                      |
|-------------------------------------|--------------------------------------------------------------------|---------------------------------------------------------------------------------------------------|----------------------------------------------------------------------------------------------------|-----------------------------------------------------------------------------------------------|--------------------------------------------------------------------------------------|
| <b>Readiness</b>                    | Lacks the necessary knowledge for group work.                      | Has insufficient knowledge for effective utilization in group work.                               | Possesses some level of knowledge required for group work but utilization is not sufficient.       | Has a good amount of knowledge required for group work but utilization is not fully adequate. | Possesses ample knowledge required for group work and can effectively utilize it.    |
| <b>Understanding of the Task</b>    | Doesn't understand the assignment.                                 | Has little understanding of the assignment and doesn't grasp what needs to be done.               | Has a general understanding of the assignment but lacks an understanding of what needs to be done. | Understands the assignment well but doesn't fully grasp what needs to be done.                | Fully understands the assignment and knows what needs to be done.                    |
| <b>Membership &amp; Cooperation</b> | Doesn't understand their role.                                     | Understands their role to some extent, but their contribution as a team member is not sufficient. | Generally understands their role, but their membership contribution is not fully utilized.         | Understands their role and is contributing as a team member.                                  | Fully understands their role, and their membership contribution is substantial.      |
| <b>Participation Attitude</b>       | Has no opinion and does not attempt to listen to others' opinions. | Has no opinion of their own but reacts to others' opinions with nods.                             | Doesn't clearly express their own opinion but tries to listen to others' opinions.                 | Expresses their own opinion but cannot fully listen to others' opinions.                      | Clearly expresses their own opinion and is able to fully listen to others' opinions. |

Citation: Mimitsu, N., "An Examination of Trial Practice in 'Introduction to Nursing' Introducing Peer Evaluation through Rubrics," St. Luke's International University Bulletin, 52, 2019.

| Supplementary Table S2. RIPLS Japanese version |    |                                                                                                                          |  |  |  |  |  |
|------------------------------------------------|----|--------------------------------------------------------------------------------------------------------------------------|--|--|--|--|--|
| Team and collaborations (13 items)             |    |                                                                                                                          |  |  |  |  |  |
|                                                | 1  | Learning with other students will help me become a more effective member of a health care team                           |  |  |  |  |  |
|                                                | 2  | Patients would ultimately benefit if health care students worked together to solve patient problems                      |  |  |  |  |  |
|                                                | 3  | Shared learning with other health care students will increase my ability to understand clinical problems                 |  |  |  |  |  |
|                                                | 4  | Learning with health care students before qualification would improve relationships after qualification                  |  |  |  |  |  |
|                                                | 5  | Communication skills should be learned with other health care students                                                   |  |  |  |  |  |
|                                                | 6  | Shared learning will help me to think positively about other professionals                                               |  |  |  |  |  |
|                                                | 7  | For small group learning to work, students need to trust and respect each other                                          |  |  |  |  |  |
|                                                | 8  | Team-working skills are essential for all health care students to learn                                                  |  |  |  |  |  |
|                                                | 9  | Shared learning will help me to understand my own limitations                                                            |  |  |  |  |  |
|                                                | 10 | Shared learning with other health care students will help me to communicate better with patients and other professionals |  |  |  |  |  |
|                                                | 11 | I would welcome the opportunity to work on small-group projects with other health care students                          |  |  |  |  |  |
|                                                | 12 | Shared learning will help to clarify the nature of patient problems                                                      |  |  |  |  |  |
|                                                | 13 | Shared learning before qualification will help me become a better team worker                                            |  |  |  |  |  |
| IPE opportunity (2 items)                      |    |                                                                                                                          |  |  |  |  |  |
|                                                | 14 | I do not want to waste my time learning with other health care students                                                  |  |  |  |  |  |
|                                                | 15 | It is not necessary for undergraduate health care students to learn together                                             |  |  |  |  |  |
| Uniqueness of profession(4 items)              |    |                                                                                                                          |  |  |  |  |  |
|                                                | 16 | Clinical problem solving skills can only be learned with students from my own department                                 |  |  |  |  |  |
|                                                | 17 | The function of nurses and therapists is mainly to provide support for doctors                                           |  |  |  |  |  |
|                                                | 18 | I am not sure what my professional role will be                                                                          |  |  |  |  |  |
|                                                | 19 | I have to acquire much more knowledge and skills than other health care students                                         |  |  |  |  |  |
| reverse scoring items ;14, 15, 16, 17, 18      |    |                                                                                                                          |  |  |  |  |  |

**Table S3: Items for IPET**

|    |                                                                                                                                                                 |
|----|-----------------------------------------------------------------------------------------------------------------------------------------------------------------|
|    |                                                                                                                                                                 |
|    | <b>Domain 1: Feelings about the profession I am training for</b>                                                                                                |
| 1  | I'd like to continue working in the profession I am training for a long time in the future.                                                                     |
| 2  | I think that I am suitable for the profession I am training for.                                                                                                |
| 3  | If I went back in time to the start of university, I would choose the same field of study.                                                                      |
| 4  | If I am consulted by one of my juniors who says that he or she wants to become a professional, I would recommend the profession I myself wish to do.            |
| 5  | I have pride in the profession I am training for.                                                                                                               |
| 6  | I'd like to learn more about the profession I am training for.                                                                                                  |
| 7  | I'm satisfied with my choice of profession.                                                                                                                     |
| 8  | I have confidence I will work in my chosen profession in the future.                                                                                            |
|    |                                                                                                                                                                 |
|    | <b>Domain 2: Understanding the role of each profession's specialization</b>                                                                                     |
| 1  | I think I understand the role of a doctor.                                                                                                                      |
| 2  | I think I understand the role of a nurse.                                                                                                                       |
| 3  | I think I understand the role of a clinical laboratory technologist.                                                                                            |
| 4  | I think I understand the role of a pharmacist.                                                                                                                  |
| 5  | I think I understand the role of a physical therapist.                                                                                                          |
| 6  | I think I understand the role of an occupational therapist.                                                                                                     |
| 7  | I think I understand the role of a speech therapist.                                                                                                            |
| 8  | I think I understand the role of a radiologist.                                                                                                                 |
| 9  | I think I understand the role of a nutritionist.                                                                                                                |
| 10 | I think I understand the role of a social worker.                                                                                                               |
|    |                                                                                                                                                                 |
|    | <b>Domain 3: Regarding participation in group work</b>                                                                                                          |
| 1  | I speak to convey my thoughts to the other members.                                                                                                             |
| 2  | I strive to listen to the opinions of other members.                                                                                                            |
| 3  | I take a flexible attitude when presented with opinions differing from my own.                                                                                  |
| 4  | I actively participate in group work as a member of the group.                                                                                                  |
| 5  | I strive to advance the group work by cooperating with other members.                                                                                           |
| 6  | I strive to demonstrate the specialization of my particular profession.                                                                                         |
|    |                                                                                                                                                                 |
|    | <b>Domain 4: Thoughts regarding the team in healthcare and welfare Items</b>                                                                                    |
| 1  | I think it is important that each team member tries to understand the opinions of other members.                                                                |
| 2  | It is important that each team member recognizes and accepts the differences between themselves and other members.                                              |
| 3  | It is important that each participating member shares each patient's problems when making care policies.                                                        |
| 4  | It is important to keep the patient's desires central when considering their care policy.                                                                       |
| 5  | It is important that each team member understands the team's goal, has an awareness of their role in meeting that goal, and works responsibly toward that goal. |
| 6  | It is important that all team members participate in the discussion.                                                                                            |
| 7  | Deeper understanding of the patient is made possible by discussion with team members.                                                                           |
| 8  | It is possible to provide better care for patients by having team discussions.                                                                                  |
| 9  | Team members should treat all team members as equals.                                                                                                           |
| 10 | Team members should mutually support each other.                                                                                                                |
|    |                                                                                                                                                                 |
|    | <b>Domain 5: Feelings about cooperation among different professions</b>                                                                                         |
| 1  | I think that cooperation among many professions leads to better care for both patients and families.                                                            |
| 2  | I think that cooperation among many professions leads to better health care by each profession.                                                                 |
| 3  | I think there are common areas which any health, medical, and welfare professional would be able to perform.                                                    |
| 4  | I feel that by sharing goals as part of a professional team, each specialization gains better awareness of its place and role.                                  |
|    |                                                                                                                                                                 |
